# Supplementary material
Source: PubMed Central journal article supplement (PMC4375616)
Supplement: mmc1.pdf [file mmc1.pdf]

The American Journal of Human Genetics

Supplemental Data

## **Dominance Genetic Variation Contributes Little to the Missing Heritability for Human Complex Traits**

Zhihong Zhu, Andrew Bakshi, Anna A.E. Vinkhuyzen, Gibran Hemani, Sang Hong Lee, Ilja M. Nolte, Jana V. van Vliet-Ostaptchouk, Harold Snieder, The LifeLines Cohort Study, Tonu Esko, Lili Milani, Reedik Mägi, Andres Metspalu, William G. Hill, Bruce S. Weir, Michael E. Goddard, Peter M. Visscher, and Jian Yang

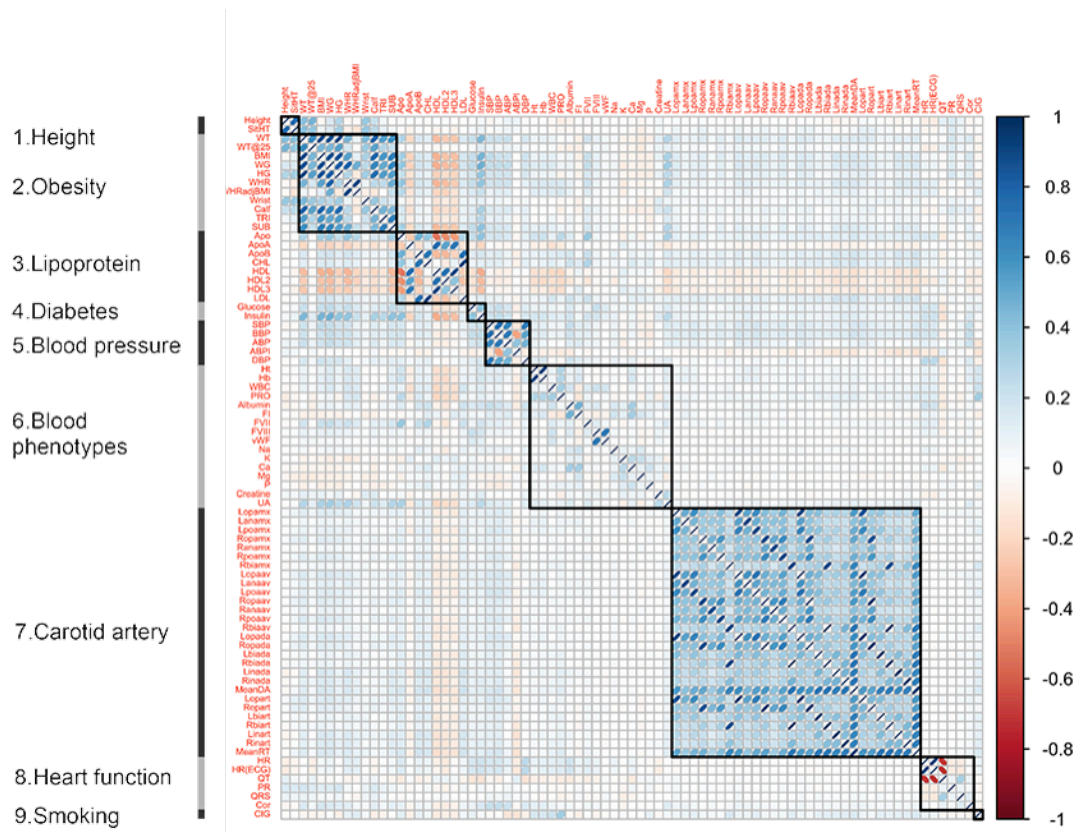

**Figure S1. Pairwise phenotypic correlations between 79 quantitative traits in the ARIC cohort.**

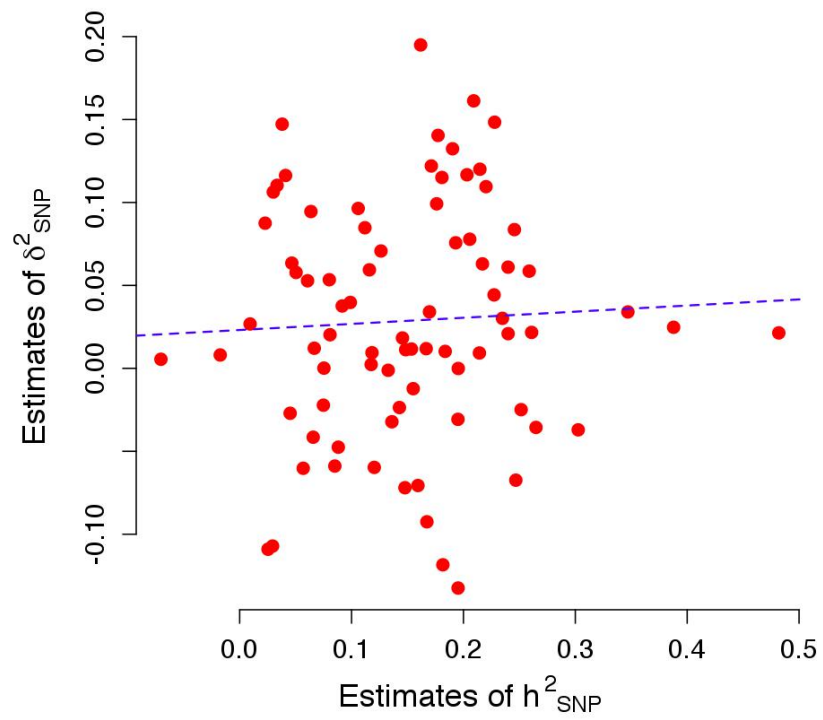

**Figure S2. Estimate of  $\delta^2_{SNP}$  against that of  $h^2_{SNP}$  in the ARIC cohort.** The regression slope is 0.04, which is not significantly different from zero ( $P = 0.67$ ).

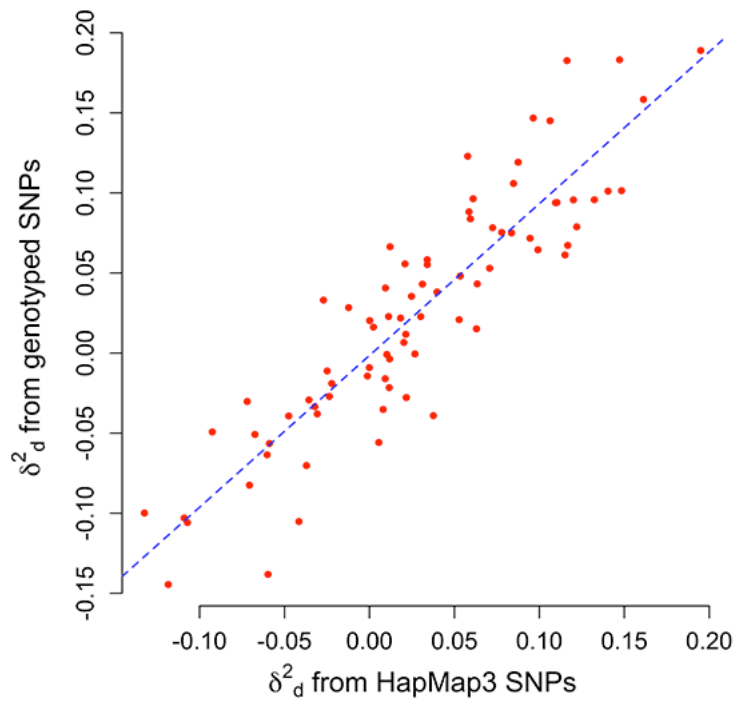

**Figure S3. Plot of the estimates of  $\delta_{SNP}^2$  using genotyped data against those using imputed data for the 79 traits in the ARIC cohort.** The mean estimate of  $\delta_{SNP}^2$  across all the 79 traits is 3% using genotype data, which is exactly the same as that using imputed data (HapMap phase 3 SNPs extracted from 1000G imputed data). The regression slope is 0.95 (SE=0.05), which is not significantly different from 1.

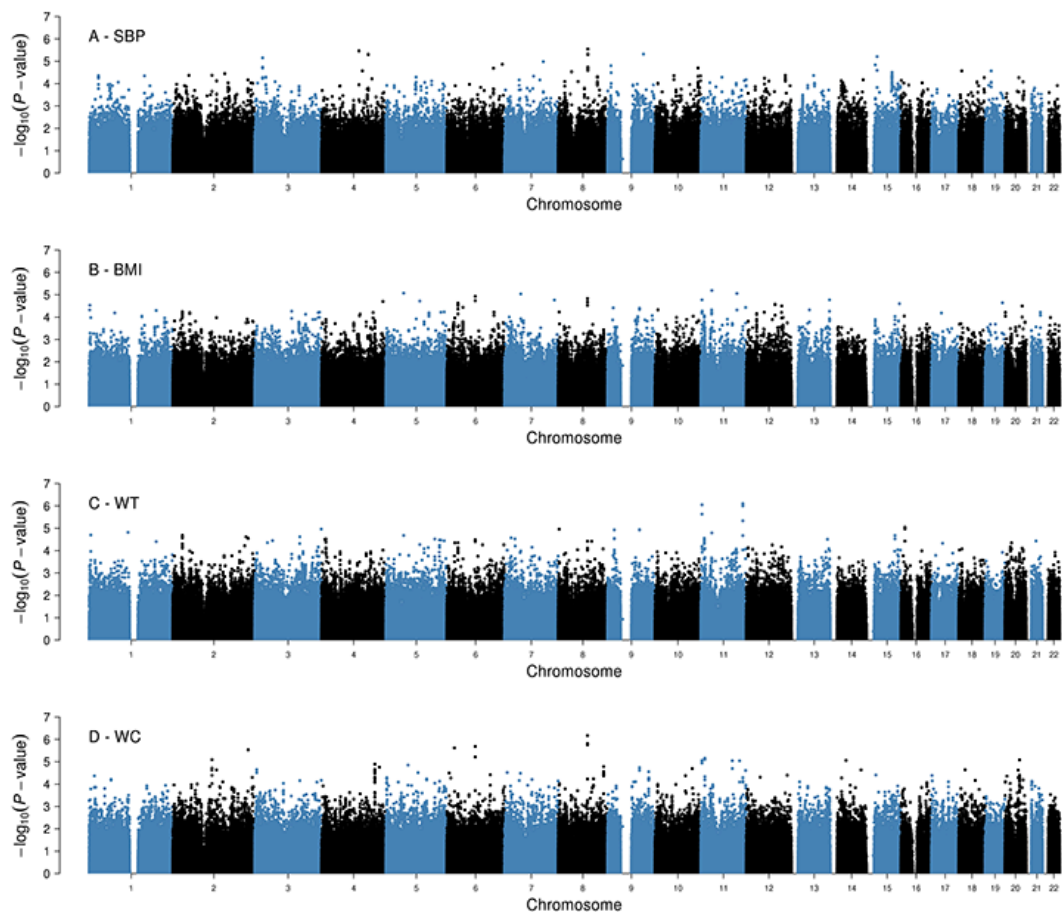

**Figure S4. Genome-wide association tests for dominance effects for 4 quantitative traits in the combined sample of EGCUT and LL cohorts.** These traits are a) SBP (systolic blood pressure), b) BMI (body mass index), c) WT (weight), and d) WC (waist circumference). Plotted are  $-\log_{10}$  of  $p$ -values for dominance effects from the analysis of fitting both additive and dominance effects.

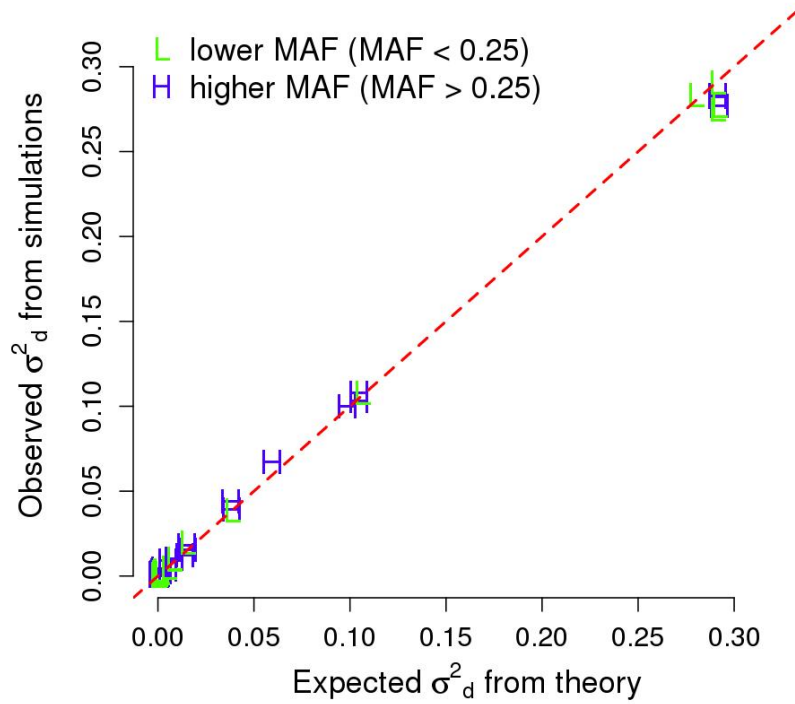

**Figure S5. Plot of the observed  $\sigma_d^2$  from simulations against the expected  $\sigma_d^2$  from theory.** In theory<sup>1</sup>, dominance variance at a SNP equals dominance variance at a causal variant times  $r^4$  with  $r$  being the LD correlation between the SNP and the causal variant, i.e.  $\sigma_d^2 = r^4 \sigma_{d(\text{Causal})}^2$ . To confirm this, we conducted simulations by extracting 1,000 proximal SNPs on chromosome 1 as a pool of causal variants (including 577 SNPs with MAF < 0.25 and 423 SNPs with MAF > 0.25) and one additional SNP (MAF = 0.18) as the observed SNP from the ARIC data set. For each of the causal variants, we generated a quantitative phenotype using the same simulation approach as in **Appendix** with  $\sigma_{a(\text{Causal})}^2 / \sigma_p^2 = 0.3$  and  $\sigma_{d(\text{Causal})}^2 / \sigma_p^2 = 0.3$  with  $\sigma_p^2$  being the phenotypic variance, and estimated  $\sigma_d^2$  from an association analysis of the observed SNP and simulated phenotype using Equation 5. The LD between the observed SNP and the causal variants is a function of MAF difference between the SNP and causal variants, which causes variation in  $\sigma_d^2$ .

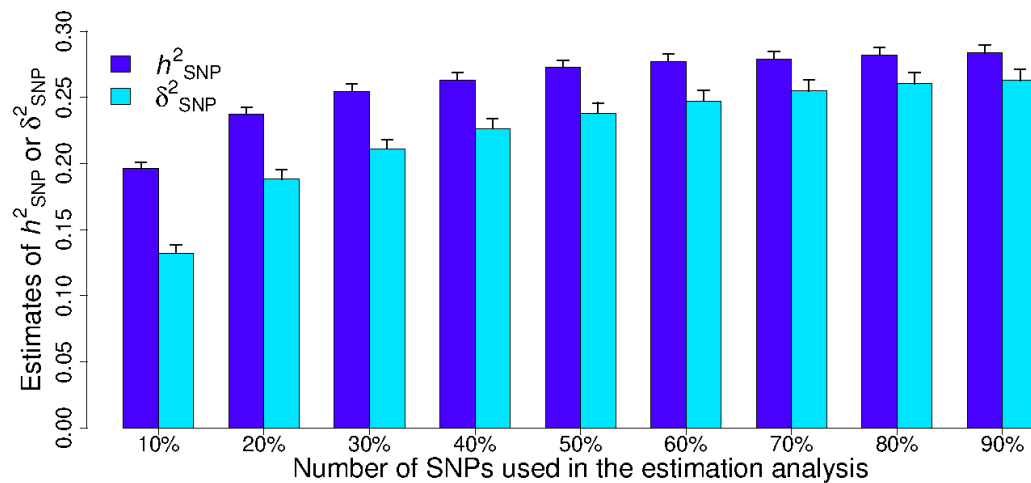

**Figure S6. Estimates of  $h^2_{SNP}$  and  $\delta^2_{SNP}$  based on a range of numbers of SNPs from simulations.** Simulation strategy can be found in the **Appendix**. In brief, we randomly sampled 10% of SNPs as a pool of “unobserved causal variants”, and used the remaining 90% as the “observed SNPs”. We gradually reduced the LD between the observed SNPs and the unobserved causal variants by including a smaller number of “observed SNPs” in the GREMLd estimation analysis. Shown are the mean estimates over 100 simulations. Error bars are the standard errors of mean estimates.

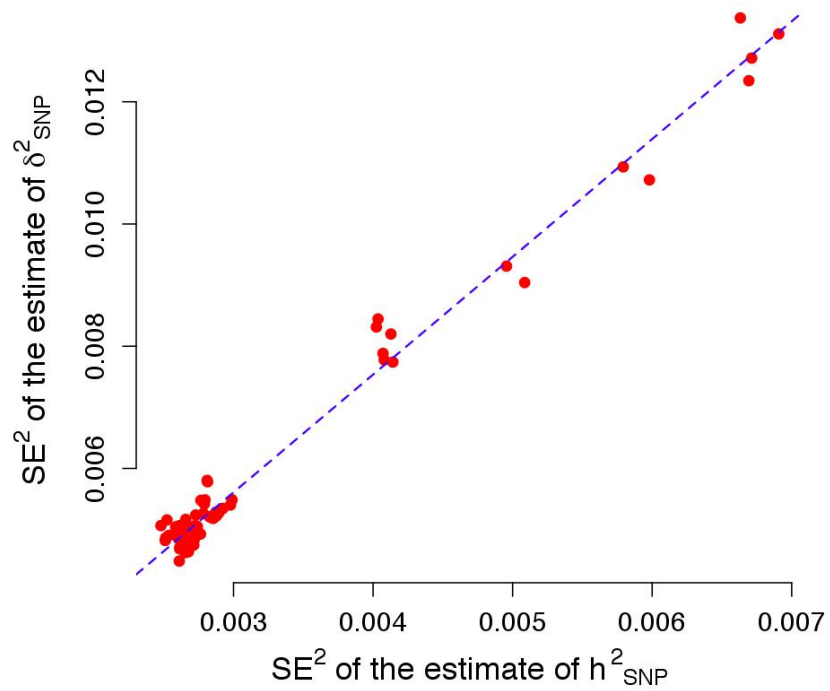

**Figure S7. Plot of  $SE^2(\hat{h}_{SNP}^2)$  against  $SE^2(\hat{\delta}_{SNP}^2)$  for 79 traits in the ARIC cohort.**

The blue dash line represents the fitted regression with a slope of 1.93.  $SE^2(\hat{h}_{SNP}^2)$  and  $SE^2(\hat{\delta}_{SNP}^2)$  are the estimates of  $\text{var}(\hat{h}_{SNP}^2)$  and  $\text{var}(\hat{\delta}_{SNP}^2)$ , respectively.



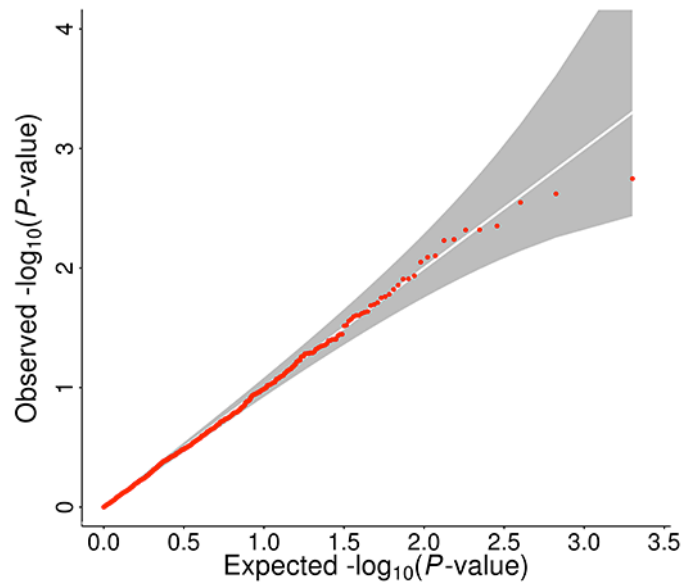

**Figure S8. QQ-plot of  $p$ -values for dominance variation at an observed SNP from 1000 simulations where the underlying causal variant has a strong genetic effect that is purely additive.** Genotypes of the causal variant and the SNP are generated from a bivariate binomial distribution, given simple size = 5,000, MAF = 0.4 for the causal variant, MAF = 0.2 for the SNP, and LD  $r^2 = 0.25$ . The phenotype is generated as such that additive variance at the causal variance explained 10% of the phenotypic variance, and the dominance variance is 0. Association test for dominance variance at the SNP is performed based on the method described in Equation (3). The grey area shown on the figure is the 95% confidence interval.

**Table S1.** Genotyping and quality controls in the ARIC, EGCUT and Lifelines cohorts.

| Cohort    | Platform                                   | Inclusion criteria |               |                  |                    | SNPs that met QC |
|-----------|--------------------------------------------|--------------------|---------------|------------------|--------------------|------------------|
|           |                                            | MAF                | SNP call rate | Sample call rate | <i>p</i> for HWE   |                  |
| ARIC      | Affymetrix Genome-Wide Human SNP Array 6.0 | ≥ 1%               | ≥ 98%         | ≥ 98%            | > 10 <sup>-3</sup> | 593,521          |
| EGCUT     | Illumina Human370CNV                       | ≥ 1%               | ≥ 95%         | ≥ 95%            | > 10 <sup>-6</sup> | 326,898          |
|           | Illumina OMNI-Express                      | ≥ 1%               | ≥ 95%         | ≥ 95%            | > 10 <sup>-6</sup> | 633,182          |
| Lifelines | Illumina Cyto SNP12 v2                     | ≥ 1%               | ≥ 95%         | ≥ 95%            | > 10 <sup>-6</sup> | 245,943          |

*p* for HWE: *p*-value from Hardy-Weinberg Equilibrium test.

**Table S2.** Descriptive summary of the 79 quantitative traits in the ARIC cohort.

| Group            | Trait              | Description (unit)                                                | Mean (SD) in males | Mean (SD) in females |
|------------------|--------------------|-------------------------------------------------------------------|--------------------|----------------------|
| Height           | Height             | Height (cm)                                                       | 176.2 (6.48)       | 162 (5.9)            |
|                  | SitHT              | Sitting height (cm)                                               | 92.8 (3.47)        | 86.4 (3.34)          |
| Obesity          | WT                 | Weight (lb)                                                       | 187.5 (30.02)      | 153.7 (32.64)        |
|                  | WT@25              | Weight at the age of 25 (lb)                                      | 165.8 (26.05)      | 126.4 (19.87)        |
|                  | BMI                | Weight (kg) divided by squared height (m)                         | 27.4 (3.98)        | 26.6 (5.49)          |
|                  | WC                 | Waist circumference (cm)                                          | 99.6 (10.37)       | 93.1 (14.83)         |
|                  | HC                 | Hip circumference (cm)                                            | 102.7 (7.54)       | 104.2 (10.86)        |
|                  | WHR                | Waist-to-hip ratio, the ratio of waist to hip                     | 1 (0.05)           | 0.9 (0.08)           |
|                  | WHRadjBMI          | BMI adjusted WHR                                                  | 0.8 (0.04)         | 0.7 (0.07)           |
| Lipoprotein      | Wrist              | Wrist breadth (mm)                                                | 57.8 (3.57)        | 49.8 (3.32)          |
|                  | Calf               | Calf circumference (cm)                                           | 38.2 (3.07)        | 36.7 (3.85)          |
|                  | TRI                | Triceps skinfold (mm)                                             | 19.6 (7.67)        | 28.9 (7.95)          |
|                  | SUB                | Subscapular skinfold (mm)                                         | 21.2 (8.16)        | 22.4 (10.22)         |
|                  | Apo                | Apolipoprotein (mmol/L)                                           | 1.7 (1.13)         | 1.5 (0.94)           |
|                  | ApoA               | Apolipoprotein (mg/L)                                             | 1187.9 (248.74)    | 1417.7 (314.18)      |
|                  | ApoB               | Apolipoprotein B (mg/L)                                           | 958.6 (268.52)     | 919.6 (289.79)       |
| Diabetes         | CHL                | Cholesterol (mmol/L)                                              | 5.5 (0.99)         | 5.7 (1.1)            |
|                  | HDL                | High-density lipoprotein (mmol/L)                                 | 1.1 (0.32)         | 1.5 (0.44)           |
|                  | HDL2               | Subfraction of HDL cholesterol (mmol/L)                           | 0.3 (0.15)         | 0.4 (0.24)           |
|                  | HDL3               | Subfraction of HDL cholesterol (mmol/L)                           | 0.8 (0.25)         | 1 (0.27)             |
|                  | LDL                | LDL cholesterol (mmol/L)                                          | 3.6 (0.92)         | 3.5 (1.03)           |
|                  | Glucose            | Glucose (mmol/L)                                                  | 6 (1.64)           | 5.7 (1.7)            |
|                  | Insulin            | Insulin (pmol/L)                                                  | 91.1 (120.1)       | 78.2 (122.21)        |
| Blood pressure   | SBP                | Systolic blood pressure (mmHg)                                    | 120.1 (16.09)      | 116.9 (17.54)        |
|                  | BBP                | Brachial systolic blood pressure (mmHg)                           | 130.4 (18.81)      | 123.4 (20.41)        |
|                  | ABP                | Ankle systolic blood pressure (mmHg)                              | 151.1 (22.37)      | 135.8 (22.93)        |
|                  | ABPI               | Ankle-brachial index, the ratio of ABP to BBP                     | 1.2 (0.14)         | 1.1 (0.14)           |
|                  | DBP                | Diastolic blood pressure (mmHg)                                   | 73.6 (10.01)       | 69.8 (9.73)          |
| Blood phenotypes | Ht                 | Hematocrit, the volume percentage (%) of red blood cells in blood | 44.7 (2.94)        | 40 (2.86)            |
|                  | Hb                 | Hemoglobin                                                        | 15 (1.01)          | 13.3 (1)             |
|                  | WBC                | White blood cells count $\times 1000/\text{mm}^3$                 | 6.5 (2.08)         | 6.2 (1.88)           |
|                  | PRO                | Blood proteins (gm/dl)                                            | 7.2 (0.39)         | 7.2 (0.41)           |
|                  | Albumin            | Albumin (gm/dl)                                                   | 3.9 (0.24)         | 3.9 (0.25)           |
|                  | FI                 | Factor I                                                          | 294 (61.37)        | 299.4 (60.52)        |
|                  | FVII               | Factor VII                                                        | 111.5 (24.54)      | 125.2 (30.97)        |
|                  | FVIII              | Factor VIII                                                       | 122.8 (33.56)      | 127.4 (34.41)        |
|                  | vWF                | von Willebrand factor                                             | 113.5 (43.23)      | 111.4 (42.46)        |
|                  | Na                 | Sodium (mmol/L)                                                   | 140.9 (2.32)       | 140.9 (2.41)         |
|                  | K                  | Potassium (mmol/L)                                                | 4.6 (0.44)         | 4.5 (0.48)           |
|                  | Ca                 | Calcium (mg/dl)                                                   | 1.2 (0.16)         | 1 (0.14)             |
|                  | Mg                 | Magnesium (meq/L)                                                 | 9.7 (0.40)         | 9.8 (0.42)           |
| P                | Phosphorus (meq/L) | 1.7 (0.15)                                                        | 1.6 (0.15)         |                      |

|                |                                                             |                                                              |            |            |
|----------------|-------------------------------------------------------------|--------------------------------------------------------------|------------|------------|
|                | Creatine                                                    | Serum creatine (mg/dl)                                       | 3.2 (0.44) | 3.6 (0.46) |
|                | UA                                                          | Uric acid (mg/dl)                                            | 6.7 (1.33) | 5.3 (1.34) |
| Carotid artery | Lopamx                                                      | Maximum far wall width<br>(L common carotid: opt ang)        | 0.8 (0.25) | 0.7 (0.21) |
|                | Lanamx                                                      | Maximum far wall width<br>(L common carotid: anterior angle) | 0.8 (0.24) | 0.7 (0.19) |
|                | Lpoamx                                                      | Maximum far wall width<br>(L common carotid: pst ang)        | 0.8 (0.27) | 0.7 (0.20) |
|                | Ropamx                                                      | Maximum far wall width<br>(R common carotid: opt ang)        | 0.8 (0.25) | 0.7 (0.21) |
|                | Ranamx                                                      | Maximum far wall width<br>(R common carotid: an ang)         | 0.8 (0.22) | 0.7 (0.19) |
|                | Rpoamx                                                      | Maximum far wall width<br>(R common carotid: pst ang)        | 0.8 (0.25) | 0.7 (0.19) |
|                | Rbiamx                                                      | Maximum far wall width<br>(R bifurcation)                    | 1.2 (0.69) | 1.0 (0.52) |
|                | Lopaav                                                      | Average far wall width (L common<br>carotid: opt ang)        | 0.7 (0.19) | 0.6 (0.16) |
|                | Lanaav                                                      | Average far wall width<br>(L common carotid: anterior angle) | 0.7 (0.18) | 0.6 (0.15) |
|                | Lpoaav                                                      | Average far wall width<br>(L common carotid: pst ang)        | 0.7 (0.19) | 0.6 (0.16) |
|                | Ropaav                                                      | Average far wall width<br>(R common carotid: opt ang)        | 0.7 (0.19) | 0.6 (0.15) |
|                | Ranaav                                                      | Average far wall width<br>(R common carotid: ant ang)        | 0.7 (0.18) | 0.6 (0.15) |
|                | Rpoaav                                                      | Average far wall width<br>(R common carotid: pst ang)        | 0.7 (0.19) | 0.6 (0.14) |
|                | Rbiaav                                                      | Average far wall width<br>(R bifurcation)                    | 0.9 (0.45) | 0.8 (0.34) |
|                | Lopada                                                      | Average far wall thickness (L opt)                           | 0.7 (0.17) | 0.6 (0.15) |
|                | Ropada                                                      | Average far wall thickness (R opt)                           | 0.7 (0.17) | 0.6 (0.14) |
|                | Lbiada                                                      | Derived average far wall thickness<br>(L bifurcation)        | 0.9 (0.33) | 0.8 (0.26) |
|                | Rbiada                                                      | Derived average far wall thickness<br>(R bifurcation)        | 0.9 (0.37) | 0.8 (0.29) |
| Linada         | Derived average far wall thickness<br>(L internal carotid)  | 0.7 (0.28)                                                   | 0.7 (0.26) |            |
| Rinada         | Derived average far wall thickness<br>(R internal carotid)  | 0.8 (0.35)                                                   | 0.7 (0.28) |            |
| MeanDA         | Mean of the derived average far<br>wall thickness variables | 0.8 (0.20)                                                   | 0.7 (0.17) |            |
| Lopart         | Derived average far wall thickness<br>(L opt)               | 0.7 (0.17)                                                   | 0.6 (0.15) |            |
| Ropart         | Derived average far wall thickness<br>(R opt)               | 0.6 (0.17)                                                   | 0.6 (0.13) |            |
| Lbiart         | Derived average far wall thickness<br>(L bifurcation)       | 0.9 (0.33)                                                   | 0.8 (0.26) |            |
| Rbiart         | Derived average far wall thickness<br>(R bifurcation)       | 0.9 (0.37)                                                   | 0.8 (0.28) |            |
| Linart         | Derived average far wall thickness<br>(L internal carotid)  | 0.7 (0.28)                                                   | 0.6 (0.25) |            |
| Rinart         | Derived average far wall thickness<br>(R internal carotid)  | 0.8 (0.34)                                                   | 0.7 (0.28) |            |
| MeanRT         | Mean of the derived average far                             | 0.8 (0.20)                                                   | 0.7 (0.16) |            |

| wall thickness variables |         |                                                                                          |                |                |
|--------------------------|---------|------------------------------------------------------------------------------------------|----------------|----------------|
| Heart function           | HR      | Heart rate                                                                               | 66.1 (9.95)    | 69 (9.43)      |
|                          | HR(ECG) | HR measured by electrocardiography (ECG)                                                 | 64.9 (10.03)   | 68 (9.65)      |
|                          | QT      | Q-T interval                                                                             | 408.5 (28.75)  | 411.7 (27.82)  |
|                          | PR      | P-R interval                                                                             | 167.3 (24.98)  | 160.5 (24.53)  |
|                          | QRS     | QRS complex, the combination of three of the graphical deflection, Q, R, and S waves.    | 101.6 (12.79)  | 94.5 (11.16)   |
|                          | Cor     | Cornell voltage                                                                          | 13.1 (5.10)    | 10 (4.24)      |
| Smoking                  | CIG     | Cigarette smoking, average number of cigarettes per day times the number of years smoked | 470.8 (492.07) | 230.2 (350.77) |

**Table S3.** Estimates of variance explained by additive and dominance variation at all SNPs for the 79 traits in ARIC cohort.

| Group            | Trait          | <i>n</i>    | $h^2_{\text{SNP}}$ (SE) | <i>P</i>        | $\delta^2_{\text{SNP}}$ (SE) | <i>P</i>        |
|------------------|----------------|-------------|-------------------------|-----------------|------------------------------|-----------------|
| Height           | Height         | 6710        | 0.48 (0.05)             | < 1E-16         | 0.02 (0.07)                  | 3.78E-01        |
|                  | SitHT          | 6704        | 0.39 (0.05)             | 8.55E-15        | 0.02 (0.07)                  | 3.63E-01        |
| Obesity          | <b>*WT</b>     | <b>6709</b> | <b>0.18 (0.05)</b>      | <b>2.14E-04</b> | <b>0.14 (0.07)</b>           | <b>2.28E-02</b> |
|                  | WT@25          | 6698        | 0.22 (0.05)             | 6.23E-06        | 0.11 (0.07)                  | 5.81E-02        |
|                  | <b>*BMI</b>    | <b>6709</b> | <b>0.23 (0.05)</b>      | <b>3.50E-06</b> | <b>0.15 (0.07)</b>           | <b>1.67E-02</b> |
|                  | <b>*WC</b>     | <b>6707</b> | <b>0.17 (0.05)</b>      | <b>3.06E-04</b> | <b>0.12 (0.07)</b>           | <b>4.13E-02</b> |
|                  | HC             | 6706        | 0.17 (0.05)             | 4.55E-04        | 0.01 (0.07)                  | 4.32E-01        |
|                  | WHR            | 6704        | 0.18 (0.05)             | 1.36E-04        | 0.12 (0.07)                  | 5.10E-02        |
|                  | WHRadjBMI      | 6701        | 0.13 (0.05)             | 3.00E-03        | 0.00 (0.07)                  | 4.93E-01        |
|                  | Wrist          | 6709        | 0.26 (0.05)             | 9.81E-08        | 0.06 (0.07)                  | 2.08E-01        |
|                  | <b>*Calf</b>   | <b>6708</b> | <b>0.21 (0.05)</b>      | <b>1.09E-05</b> | <b>0.12 (0.07)</b>           | <b>3.67E-02</b> |
|                  | TRI            | 6708        | 0.19 (0.05)             | 1.25E-04        | 0.08 (0.07)                  | 1.38E-01        |
| Lipoprotein      | SUB            | 6689        | 0.23 (0.05)             | 2.81E-06        | 0.04 (0.07)                  | 2.60E-01        |
|                  | Apo            | 6691        | 0.30 (0.05)             | 1.39E-09        | -0.04 (0.07)                 | 2.98E-01        |
|                  | ApoA           | 6702        | 0.14 (0.05)             | 2.26E-03        | -0.02 (0.07)                 | 3.65E-01        |
|                  | ApoB           | 6703        | 0.15 (0.05)             | 1.06E-03        | 0.01 (0.07)                  | 4.34E-01        |
|                  | CHL            | 6699        | 0.26 (0.05)             | 1.29E-07        | 0.02 (0.07)                  | 3.79E-01        |
|                  | HDL            | 6705        | 0.25 (0.05)             | 5.53E-07        | -0.07 (0.07)                 | 1.63E-01        |
|                  | HDL2           | 6702        | 0.11 (0.05)             | 1.64E-02        | 0.08 (0.07)                  | 1.12E-01        |
|                  | HDL3           | 6704        | 0.20 (0.05)             | 4.47E-05        | -0.13 (0.07)                 | 2.59E-02        |
| Diabetes         | LDL            | 6595        | 0.21 (0.05)             | 1.42E-05        | 0.01 (0.07)                  | 4.48E-01        |
|                  | Glucose        | 6679        | 0.17 (0.05)             | 4.82E-04        | -0.09 (0.07)                 | 8.98E-02        |
| Blood pressure   | Insulin        | 6699        | 0.06 (0.05)             | 1.10E-01        | 0.05 (0.07)                  | 2.34E-01        |
|                  | <b>*SBP</b>    | <b>6711</b> | <b>0.21 (0.05)</b>      | <b>1.71E-05</b> | <b>0.16 (0.07)</b>           | <b>1.18E-02</b> |
|                  | BBP            | 6481        | 0.18 (0.05)             | 4.06E-04        | 0.10 (0.07)                  | 7.81E-02        |
|                  | <b>*ABP</b>    | <b>6481</b> | <b>0.16 (0.05)</b>      | <b>7.78E-04</b> | <b>0.19 (0.07)</b>           | <b>3.59E-03</b> |
|                  | ABPI           | 6472        | 0.06 (0.05)             | 1.09E-01        | 0.09 (0.07)                  | 8.94E-02        |
| Blood phenotypes | DBP            | 6710        | 0.21 (0.05)             | 3.66E-05        | 0.08 (0.07)                  | 1.38E-01        |
|                  | Ht             | 6692        | 0.16 (0.05)             | 9.22E-04        | -0.07 (0.07)                 | 1.55E-01        |
|                  | Hb             | 6691        | 0.20 (0.05)             | 7.60E-05        | -0.03 (0.07)                 | 3.28E-01        |
|                  | WBC            | 6695        | 0.26 (0.05)             | 6.61E-08        | -0.04 (0.07)                 | 3.01E-01        |
|                  | PRO            | 6708        | 0.20 (0.05)             | 3.30E-05        | 0.00 (0.07)                  | 5.00E-01        |
|                  | Albumin        | 6709        | 0.11 (0.05)             | 1.73E-02        | 0.10 (0.07)                  | 8.52E-02        |
|                  | FI             | 6685        | 0.24 (0.05)             | 1.47E-06        | 0.02 (0.07)                  | 3.84E-01        |
|                  | FVII           | 6550        | 0.18 (0.05)             | 1.77E-04        | -0.12 (0.07)                 | 4.89E-02        |
|                  | FVIII          | 6682        | 0.25 (0.05)             | 2.96E-07        | -0.02 (0.07)                 | 3.57E-01        |
|                  | vWF            | 6684        | 0.35 (0.05)             | 3.69E-12        | 0.03 (0.07)                  | 3.10E-01        |
|                  | Na             | 6708        | 0.05 (0.05)             | 1.51E-01        | 0.06 (0.07)                  | 2.09E-01        |
|                  | K              | 6710        | 0.15 (0.05)             | 1.68E-03        | -0.07 (0.07)                 | 1.66E-01        |
|                  | Ca             | 6706        | 0.12 (0.05)             | 1.02E-02        | 0.06 (0.07)                  | 1.94E-01        |
|                  | Mg             | 6710        | 0.07 (0.05)             | 8.78E-02        | 0.01 (0.07)                  | 4.30E-01        |
|                  | <b>*P</b>      | <b>6708</b> | <b>0.19 (0.05)</b>      | <b>6.76E-05</b> | <b>0.13 (0.07)</b>           | <b>2.68E-02</b> |
|                  | Carotid artery | Creatine    | 6709                    | 0.24 (0.05)     | 1.13E-06                     | 0.06 (0.07)     |
| UA               |                | 6709        | 0.25 (0.05)             | 1.42E-07        | 0.08 (0.07)                  | 1.13E-01        |
| Lopamx           |                | 5278        | 0.04 (0.06)             | 2.57E-01        | 0.12 (0.09)                  | 1.02E-01        |
| Lanamx           |                | 4432        | 0.08 (0.08)             | 1.42E-01        | 0.02 (0.10)                  | 4.22E-01        |
| Lpoamx           |                | 4804        | 0.12 (0.07)             | 4.37E-02        | 0.01 (0.10)                  | 4.61E-01        |
| Ropamx           |                | 5216        | 0.03 (0.06)             | 3.00E-01        | 0.11 (0.09)                  | 1.09E-01        |

|                |                 |             |                    |                 |                    |                 |
|----------------|-----------------|-------------|--------------------|-----------------|--------------------|-----------------|
|                | Ranamx          | 4143        | 0.09 (0.08)        | 1.31E-01        | 0.04 (0.11)        | 3.71E-01        |
|                | Rpoamx          | 5199        | 0.05 (0.06)        | 2.36E-01        | -0.03 (0.09)       | 3.81E-01        |
|                | Rbiamx          | 4048        | -0.07 (0.08)       | 1.95E-01        | 0.01 (0.12)        | 4.81E-01        |
|                | Lopaav          | 5279        | 0.04 (0.06)        | 2.73E-01        | 0.15 (0.09)        | 5.57E-02        |
|                | Lanaav          | 4435        | 0.15 (0.08)        | 2.95E-02        | 0.02 (0.10)        | 4.29E-01        |
|                | Lpoaav          | 4805        | 0.16 (0.07)        | 1.41E-02        | -0.01 (0.10)       | 4.48E-01        |
|                | Ropaav          | 5224        | 0.08 (0.06)        | 9.93E-02        | 0.05 (0.09)        | 2.68E-01        |
|                | Ranaav          | 4143        | 0.12 (0.08)        | 6.92E-02        | -0.06 (0.11)       | 3.00E-01        |
|                | Rpoaav          | 5200        | 0.08 (0.06)        | 1.17E-01        | 0.00 (0.09)        | 4.99E-01        |
|                | Rbiaav          | 4050        | 0.07 (0.08)        | 2.13E-01        | -0.04 (0.11)       | 3.60E-01        |
|                | Lopada          | 6350        | 0.02 (0.05)        | 3.34E-01        | 0.09 (0.08)        | 1.27E-01        |
|                | Ropada          | 6352        | 0.10 (0.05)        | 3.09E-02        | 0.04 (0.07)        | 2.86E-01        |
|                | Lbiada          | 6341        | 0.15 (0.05)        | 3.10E-03        | 0.01 (0.07)        | 4.39E-01        |
|                | Rbiada          | 6345        | 0.03 (0.05)        | 3.17E-01        | -0.11 (0.07)       | 6.96E-02        |
|                | Linada          | 6341        | -0.02 (0.05)       | 3.72E-01        | 0.01 (0.07)        | 4.56E-01        |
|                | Rinada          | 6338        | 0.06 (0.05)        | 1.43E-01        | -0.06 (0.07)       | 2.02E-01        |
|                | MeanDA          | 6351        | 0.09 (0.05)        | 4.91E-02        | -0.05 (0.07)       | 2.57E-01        |
|                | Lopart          | 6350        | 0.03 (0.05)        | 2.85E-01        | 0.11 (0.08)        | 8.24E-02        |
|                | Ropart          | 6353        | 0.13 (0.05)        | 8.50E-03        | 0.07 (0.07)        | 1.58E-01        |
|                | Lbiart          | 6341        | 0.17 (0.05)        | 8.75E-04        | 0.03 (0.07)        | 3.23E-01        |
|                | Rbiart          | 6345        | 0.03 (0.05)        | 2.93E-01        | -0.11 (0.07)       | 7.35E-02        |
|                | Linart          | 6343        | 0.01 (0.05)        | 4.30E-01        | 0.03 (0.07)        | 3.59E-01        |
|                | Rinart          | 6339        | 0.07 (0.05)        | 7.97E-02        | -0.02 (0.07)       | 3.80E-01        |
|                | MeanRT          | 6351        | 0.12 (0.05)        | 1.41E-02        | 0.00 (0.07)        | 4.87E-01        |
| Heart function | HR              | 6691        | 0.22 (0.05)        | 9.10E-06        | 0.06 (0.07)        | 1.83E-01        |
|                | <b>*HR(ECG)</b> | <b>6611</b> | <b>0.20 (0.05)</b> | <b>3.69E-05</b> | <b>0.12 (0.07)</b> | <b>4.42E-02</b> |
|                | QT              | 6616        | 0.23 (0.05)        | 3.23E-06        | 0.03 (0.07)        | 3.43E-01        |
|                | PR              | 6619        | 0.18 (0.05)        | 1.41E-04        | 0.01 (0.07)        | 4.39E-01        |
|                | QRS             | 6625        | 0.05 (0.05)        | 1.83E-01        | 0.06 (0.07)        | 1.78E-01        |
|                | Cor             | 6483        | 0.09 (0.05)        | 4.72E-02        | -0.06 (0.07)       | 1.91E-01        |
| Smoking        | CIG             | 6636        | 0.14 (0.05)        | 4.26E-03        | -0.03 (0.07)       | 3.23E-01        |

$n$  = sample size;  $h_{SNP}^2$  = variance explained by additive variation at all SNPs;  $\delta_{SNP}^2$  = variance explained by dominance variation at all SNPs; SE = standard error;  $P$  =  $p$ -value from a LRT test; \* traits (in bold) with nominally significant estimates of  $\delta_{SNP}^2$  ( $P < 0.05$ ).

**Table S4.** Mean estimates of  $h_{SNP}^2$  and  $\delta_{SNP}^2$  averaged over 100 simulations

|             | $h^2$ | Est. $h_{SNP}^2$ (SEM) | $\delta^2$ | Est. $\delta_{SNP}^2$ (SEM) |
|-------------|-------|------------------------|------------|-----------------------------|
| Scenario I  | 0.30  | 0.30 (0.01)            | 0.30       | 0.30 (0.01)                 |
| Scenario II |       | 0.28 (0.01)            |            | 0.26 (0.01)                 |

Scenario I: all the SNPs including the causal variants were included in the estimation analysis; Scenario II: causal variants were sampled from 10% of the SNPs and the other 90% of SNPs were used in the estimation analysis;  $h^2$ : variance explained by additive variation at the causal variants;  $\delta^2$ : variance explained by dominance variation at the causal variants; Est.: mean estimate over 100 simulations; Est.  $h_{SNP}^2$ : variance explained by additive variation at all SNPs in the estimation analysis (all SNPs in Scenario I, all SNPs excluding causal variants in Scenario II); Est.  $\delta_{SNP}^2$ : variance explained by dominance variation at all SNPs in the estimation analysis; SEM: standard error of the mean estimate.



## **Reference**

1. Weir, B.S. (2008). Linkage disequilibrium and association mapping. *Annu Rev Genomics Hum Genet* 9, 129-142

## **Acknowledgements**

The Atherosclerosis Risk in Communities Study is carried out as a collaborative study supported by National Heart, Lung, and Blood Institute contracts (HHSN268201100005C, HHSN268201100006C, HHSN268201100007C, HHSN268201100008C, HHSN268201100009C, HHSN268201100010C, HHSN268201100011C, and HHSN268201100012C), R01HL087641, R01HL59367 and R01HL086694; National Human Genome Research Institute contract U01HG004402; and National Institutes of Health contract HHSN268200625226C.

The authors thank the staff and participants of the ARIC study for their important contributions. Infrastructure was partly supported by Grant Number UL1RR025005, a component of the National Institutes of Health and NIH Roadmap for Medical Research.

EGCUT received funding through targeted financing from Estonian Government SF0180142s08, Estonian Research Roadmap through Estonian Ministry of Education and Research, and from Center of Excellence in Genomics (EXCEGEN), University of Tartu (SP1GVARENG), Estonian Research Council IUT2-2 grant and European Regional Development Fund.

The LifeLines Cohort Study, and generation and management of GWAS genotype data for the LifeLines Cohort Study is supported by the Netherlands Organization of Scientific Research NWO (grant 175.010.2007.006), the Economic Structure Enhancing Fund (FES) of the Dutch government, the Ministry of Economic Affairs, the Ministry of Education, Culture and Science, the Ministry for Health, Welfare and Sports, the Northern Netherlands Collaboration of Provinces (SNN), the Province of Groningen, University Medical Center Groningen, the University of Groningen, Dutch Kidney Foundation and Dutch Diabetes Research Foundation. The

authors are grateful to the study participants, the staff from the LifeLines Cohort Study and the contributing research centers delivering data to LifeLines and the participating general practitioners and pharmacists. LifeLines Cohort Study: Behrooz Z Alizadeh (1), Rudolf A de Boer (2), H Marika Boezen (1), Marcel Bruinenberg (3), Lude Franke (4), Pim van der Harst (2), Hans L Hillege (1,2), Melanie M van der Klauw (5), Gerjan Navis (6), Johan Ormel (7), Dirkje S Postma (8), Judith GM Rosmalen (7), Joris P Slaets (9), Harold Snieder (1), Ronald P Stolk (1), Bruce HR Wolffenbuttel (5), Cisca Wijmenga (4)

- (1) Department of Epidemiology, University of Groningen, University Medical Center Groningen, The Netherlands
- (2) Department of Cardiology, University of Groningen, University Medical Center Groningen, The Netherlands
- (3) LifeLines Cohort Study, University of Groningen, University Medical Center Groningen, The Netherlands
- (4) Department of Genetics, University of Groningen, University Medical Center Groningen, The Netherlands
- (5) Department of Endocrinology, University of Groningen, University Medical Center Groningen, The Netherlands
- (6) Department of Internal Medicine, Division of Nephrology, University of Groningen, University Medical Center Groningen, The Netherlands
- (7) Interdisciplinary Center of Psychopathology of Emotion Regulation (ICPE), Department of Psychiatry, University of Groningen, University Medical Center Groningen, The Netherlands
- (8) Department of Pulmonology, University of Groningen, University Medical Center Groningen, The Netherlands
- (9) University Center for Geriatric Medicine, University of Groningen, University Medical Center Groningen, The Netherlands
